# Supplementary material for: Protein compactness and interaction valency define the architecture of a biomolecular condensate across scales
Source: eLife journal article supplement (doi:10.7554/elife.80038), 2023-07-20
Supplement: fig1-data1 [file panel_C_source_data.xlsx]

## Sheet: Parameters
User interface program version	3.0.2
Instrument serial number	5017080
PROTOCOL NAME	Turbidity_@450nm
PROTOCOL CREATOR NAME	Laura Gallego
PLATE TYPE	General 96
PLATE FORMAT	96 wells (8X12)
PLATE PARAMETERS
A1 row-coordinate(µm)	11240
A1 column-coordinate(µm)	14380
Well spacing (µm)	9000
Well diameter(µm)	6500
Well volume(µl)	200
1 OPERATION	Timing-Delay
DELAY	0 hours 3 minutes 0 seconds
2 OPERATION	Shaker-Shake
SHAKE TYPE	Orbital
SHAKE POSITION	Inside
SHAKE SPEED (rpm)	300
SHAKE TIME	0 hours 1 minutes 0 seconds
3 OPERATION	Filter ABS-EndPoint
MEASUREMENT UNIT	OD
MEASUREMENT TYPE	Dual excitation
EXCITATION FILTER (1)	450/10nm
EXCITATION FILTER (2)	320/75nm
MEASUREMENT TIME (ms)	500
FLASH ENERGY (mJ)	100
MEASUREMENT ORDER	Bi-directional by rows
4 OPERATION	Shaker-Shake
SHAKE TYPE	Orbital
SHAKE POSITION	Inside
SHAKE SPEED (rpm)	300
SHAKE TIME	0 hours 1 minutes 0 seconds
5 OPERATION	Filter ABS-EndPoint
MEASUREMENT UNIT	OD
MEASUREMENT TYPE	Dual excitation
EXCITATION FILTER (1)	450/10nm
EXCITATION FILTER (2)	320/75nm
MEASUREMENT TIME (ms)	500
FLASH ENERGY (mJ)	100
MEASUREMENT ORDER	Bi-directional by rows
PLATE MAP
	1	2	3	4	5	6	7	8	9	10	11	12
A	X	X	X	X	X	X	X	X	X	X	X	X
B	X	X	X	X	X	X	X	X	X	X	X	X
C	X	X	X	X	X	X	X	X	X	X	X	X
D	X	X	X	X	X	X	X	X	X	X	X	X
E	X	X	X	X	X	X	X	X	X	X	X	X
F	X	X	X	X	X	X	X	X	X	X	X	X
G	X	X	X	X	X	X	X	X	X	X	X	X
H	buffer	buffer	buffer	buffer	buffer	buffer	buffer	buffer	buffer	buffer	buffer	buffer

## Sheet: Comments
Legend
no condensate	limit for condensate		aggregation	(by visual inspection-microscopy)
All buffers with fixed 25mM Tris pH 7.5, 1% glycerol, 1mM DTT, when not added extra for the experiment, also 100mM NaCl and 100 mM imidazole were present.
Values shown in the tables correspond to the average of three experiments for turbidity - see "Parameters" (absorbance values @450 nm, substracted buffer values)
These datapoints were used for the plots in Figure 1C

## Sheet: Solubility diagrams (WT)
Buffer NaCl (M)			0.1	0.25	0.5	0.7	1	1.5	2	2.5	3		Protein (WT)
			0.174	0.213	0.168	0.173	0.206	0.22	0.254	0.187	0.283		12µM
			0.322	0.18	0.309	0.275	0.338	0.238	0.261	0.354	0.496		10µM
			0.266	0.266	0.267	0.269	0.269	0.275	0.289	0.295	0.295		8µM
			0.461	0.366	0.32	0.173	0.11	0.102	0.098	0.099	0.102		7µM
			0.089	0.107	0.086	0.089	0.107	0.095	0.101	0.104	0.103		5µM
			0.079	0.079	0.08	0.082	0.081	0.088	0.095	0.099	0.097		4µM
			0.062	0.071	0.054	0.091	0.092	0.086	0.095	0.083	0.004		2µM
			0.076	0.054	0.092	0.097	0.048	0.06	0.06	0.019	0.003		1,2µM
Imidazole buffer (M)		0.25	0.5	0.6	0.8	1.2	1.4	1.6	1.85	2	2.2
		0.382	0.294	0.238	0.114	0.035	0.014	0.054	0.009	0.004	0		12µM
		0.233	0.176	0.14	0.084	0.036	0.078	-0.003	-0.005	-0.003	0		10µM
		0.195	0.194	0.092	0.093	0.095	0.053	0.009	0	0.003	0.002		8µM
		0.098	0.102	0.095	0.09	0.048	0.069	0.009	0.001	-0.004	0.003		7µM
		0.104	0.1	0.094	0.099	0.097	0.001	0.02	0.012	0.011	-0.001		5µM
		0.113	0.069	0.065	0.044	0.048	0.017	0.012	0.011	0.01	0.001		4µM
		0.04	0.057	0.074	0.014	0.011	0.009	0.006	-0.005	-0.008	-0.006		2µM
		0.039	0.073	0.003	0.011	0.006	0.008	0.002	-0.005	-0.003	-0.007		1,2µM
Tyr buffer (mM)		0.25	0.5	0.75	1	1.25	1.5	1.75	2	2.25	2.5
		0.283	0.275	0.283	0.274	0.274	0.261	0.259	0.26	0.248	0.235		12µM
		0.232	0.222	0.237	0.262	0.228	0.233	0.231	0.252	0.232	0.239		10µM
		0.186	0.158	0.16	0.15	0.139	0.153	0.142	0.168	0.157	0.144		8µM
		0.139	0.144	0.14	0.147	0.134	0.135	0.135	0.141	0.141	0.146		7µM
		0.12	0.118	0.112	0.132	0.121	0.11	0.133	0.121	0.129	0.113		5µM
		0.129	0.118	0.116	0.113	0.11	0.119	0.116	0.119	0.113	0.131		4µM
		0.103	0.096	0.096	0.097	0.097	0.091	0.094	0.096	0.113	0.137		2µM
		0.087	0.086	0.086	0.085	0.085	0.083	0.083	0.088	0.094	0.093		1,2µM

## Sheet: Solubility diagrams (R>K)
Buffer NaCl (M)			0.1	0.25	0.5	0.7	1	1.5	2	2.5	3		Protein (R>K)
			0.367	0.3225	0.305	0.317	0.328	0.4535	0.747	0.5585	0.587		66µM
			0.318	0.2975	0.218	0.275	0.342	0.4445	0.481	0.5665	0.569		49µM
			0.3	0.291	0.295	0.292	0.289	0.335	0.306	0.415	0.353		39µM
			0.273	0.275	0.283	0.281	0.279	0.27	0.269	0.277	0.297		30µM
			0.282	0.281	0.277	0.269	0.275	0.272	0.276	0.277	0.299		20µM
			0.067	0.052	0.0865	0.053	0.037	0.042	0.085	0.094	0.0975		12µM
			0.006	0.002	0.0015	0.004	0.002	0.004	0.001	0.006	0.001		7µM
Imidazole buffer (M)		0.25	0.5	0.6	0.8	1.2	1.4	1.6	1.85	2	2.2
		0.683	0.619	0.317	0.0029	0.0018	0.0028	0.003	0.005	0.009	0.001		66µM
		0.532	0.5145	0.235	0.007	0.009	0.004	0.002	0.0065	0.0025	0.002		49µM
		0.517	0.5065	0.231	0.006	0.012	0.009	0.006	0.0015	0.0026	0.004		39µM
		0.018	0.0515	0.005	0.006	0.003	0.018	0.002	0.0095	0.0005	0.008		30µM
		0.094	0.0615	0.0051	0.003	0.003	0.005	0.002	0.0055	0.0035	0.014		20µM
		0.092	0.064	0.003	0.09	0.452	0.013	0.011	0.0215	0.0125	0.019		12µM
		0.011	0.0085	0.011	0.002	0.001	0	0.006	0.0145	0.0165	0.016		7µM
Tyr buffer (mM)		0.25	0.5	0.75	1	1.25	1.5	1.75	2	2.25	2.5
		0.498	0.563	0.566	0.574	0.577	0.598	0.533	0.604	0.578	0.594		66µM
		0.411	0.435	0.414	0.392	0.369	0.406	0.454	0.536	0.524	0.572		49µM
		0.222	0.225	0.223	0.22	0.208	0.217	0.211	0.218	0.226	0.198		39µM
		0.234	0.222	0.225	0.223	0.22	0.208	0.117	0.198	0.205	0.202		30µM
		0.104	0.1	0.09	0.096	0.098	0.093	0.095	0.092	0.11	0.102		20µM
		0.095	0.091	0.086	0.084	0.092	0.085	0.09	0.087	0.0093	0.003		12µM
		0.012	0.01	0.009	0.0096	0.0098	0.0093	0.0095	0.0092	0.011	0.0102		7µM

## Sheet: Solubility diagrams (Y>A)
Buffer NaCl (M)			0.1	0.25	0.5	0.7	1	1.5	2	2.5	3		Protein (Y>A)
			0.0275	0.0155	0.0055	0.018	0.009	0.0135	0.013	0.0205	0.012		51µM
			0.0315	0.0025	0.0085	0.008	0.016	0.0125	0.016	0.0115	0.016		45µM
			0.0045	0.0075	0.0035	0.005	0.009	0.0065	0.014	0.0025	0.011		34µM
			0.0105	0.0065	0.0165	0.008	0.005	0.0065	0.01	0.0055	0.011		27µM
			0.0195	0.0085	0.0065	0.019	0.01	0.0135	0.021	0.0205	0.009		18µM
			0.0035	0.0045	0.0025	0.004	0.008	0.0125	0.017	0.0155	0.022		11µM
			0.007	0.0014	0.0104	0.0035	0.0093	0.0093	0.0093	0.0096	0.0101		5µM
Imidazole buffer(M)		0.25	0.5	0.6	0.8	1.2	1.4	1.6	1.85	2	2.2
		0.071	0.0655	0.0081	0.00385	0.0047	0.00255	0.0025	0.00205	0.0022	0.009		51µM
		0.033	0.0235	0.028	0.0445	0.023	0.0035	0.0105	0.0085	0.008	0.004		45µM
		0.0086	0.0085	0.004	0.003	0.008	0.005	0.008	0.006	0.007	0.008		34µM
		0.005	0.0075	0.01	0.0115	0.011	0.0095	0.0065	0.0195	0.01	0.014		27µM
		0.015	0.0235	0.022	0.0295	0.017	0.0145	0.0145	0.0135	0.016	0.013		18µM
		0.014	0.0145	0.011	0.0135	0.034	0.0165	0.0105	0.0185	0.02	0.01		11µM
		0.009	0.0045	0.004	0.0105	0.006	0.0095	0.0075	0.0165	0.016	0.025		5µM
Tyr buffer (mM)		0.25	0.5	0.75	1	1.25	1.5	1.75	2	2.25	2.5
		0.183	0.154	0.172	0.168	0.019	0.009	0.008	0.006	0.007	0.007		51µM
		0.105	0.099	0.097	0.0099	0.017	0.0097	0.008	0.009	0.007	0.003		45µM
		0.004	0.004	0.0095	0.0092	0.0098	0.0094	0.0102	0.0093	0.015	0.015		34µM
		0.004	0.001	0.0089	0.006	0.008	0.0093	0.005	0.092	0.005	0.001		27µM
		0.015	0.013	0.022	0.016	0.027	0.017	0.026	0.006	0.025	0.01		18µM
		-0.023	-0.002	0.007	0.007	0.01	0.005	0.011	0.007	0.016	0.021		11µM
		-0.024	0	0.005	0	0.006	0.002	0.013	0.003	0.004	0.003		5µM
