# Supplementary material for: Protein compactness and interaction valency define the architecture of a biomolecular condensate across scales
Source: eLife journal article supplement (doi:10.7554/elife.80038), 2023-07-20
Supplement: fig1-figsupp1-data1 [file panel_A_source_data.xlsx]

## Sheet: Sheet1
Intensity of the bands measured by ImageJ directly in gel pictures
	Gel 1							Gel 2							Gel 3							Gel 4
	WT	WT	RtK	RtoK	YtA	YtA		WT	WT	WT	WT	WT	WT		RtoK	RtoK	RtoK	RtoK	RtoK	RtoK		YtoA	YtoA	YtoA	YtoA	YtoA
Main	18433.8	17546	20259.8	31648.7	13581.1	17224.9		5511.67	8713.79	10213.3	6015.6	9062.84	10688.8		15132.7	16858.5	21478.8	10015.4	14007.1	18856.8		8376.74	13001.1	8571.57	11459.9	16282.6
Impurities	1378.65	1549.79	1875.03	2755.03	4358.18	8739.78		197.607	350.79	703.163	234.385	392.506	630.749		261.042	319.92	121.556	103.021	131.385	166.849		3999.12	6424.08	3460.43	5532.67	8756.74
Impurities	1296.6	1558.58	967.669	2085.45	1430.67	2261.28		90.192	203.263	346.263	200.678	216.849	435.678				870.69	79.607	450.87	997.012		131.435	131.607	138.607	151.678	213.678
Impurities					312.799	835.82														534.577			526.456	186.263	327.213	569.991
Total int	21109.1	20654.4	23102.5	36489.2	19682.7	29061.8		5799.47	9267.84	11262.7	6450.66	9672.2	11755.2		15393.7	17178.4	22471.1	10198	14589.3	20555.3		12507.3	20083.2	12356.9	17471.5	25823
Percentaje (%)
Main	87.3266	84.9505	87.6953	86.7345	69	59.2699		95.0375	94.0218	90.6823	93.2555	93.6999	90.9281		98.3042	98.1377	95.5843	98.2092	96.009	91.7372		66.9748	64.736	69.3669	65.5922	63.0546
Impurities	6.53106	7.50345	8.11614	7.55026	22.1422	30.0731		0.679955	1.20705	2.41955	0.806506	1.35059	2.17037		0.898231	1.10083	0.418268	0.35449	0.452089	0.574118		13.7608	22.1049	11.9071	19.0376	30.1315
Impurities	6.14237	7.54602	4.18859	5.71524	7.26866	7.78093		0.310346	0.699417	1.19147	0.690522	0.746166	1.49914		0	0	2.996	0.273923	1.55142	3.43066		0.452261	0.452852	0.476939	0.521916	0.735254
Impurities	0	0	0	0	1.58921	2.87601		0	0	0	0	0	0		0	0	0	0	0	1.83945		0	1.81151	0.640921	1.12592	1.96131
Total int	0	0
