# Supplementary material for: Protein compactness and interaction valency define the architecture of a biomolecular condensate across scales
Source: eLife journal article supplement (doi:10.7554/elife.80038), 2023-07-20
Supplement: fig1-figsupp1-data1 [file panel_C_source_data.xlsx]

## Sheet: sheet
Features of the condensates&aggregates were studied by applying the "analyze particles - shape descriptor" plugin in Fiji
Formula for circularity = 4π area / perimeter^2
WT								R>K
	Area	Circularity	AR	Round	Solidity			Area	Circularity	AR	Round	Solidity
1	0.545	1	1.121	0.892	0.931		1	0.464	0.679	1.195	0.837	0.808
2	0.22	0.575	3.699	0.27	0.731		2	0.209	1	1.13	0.885	0.857
3	0.243	0.856	1.367	0.731	0.824		3	0.278	0.86	1.483	0.674	0.857
4	1.542	0.875	1.268	0.789	0.89		4	0.464	0.65	1.241	0.806	0.8
5	0.464	0.806	1.255	0.797	0.842		5	0.673	0.984	1.024	0.976	0.899
6	0.209	0.895	1.221	0.819	0.857		6	1.287	0.923	1.065	0.939	0.888
7	0.452	0.623	1.438	0.695	0.772		7	0.8	0.764	1.12	0.893	0.826
8	0.243	0.824	1.676	0.597	0.857		8	0.904	0.921	1.119	0.894	0.881
9	0.278	0.615	2.273	0.44	0.738		9	0.73	0.8	1.033	0.968	0.824
10	0.673	0.808	1.022	0.979	0.847		10	0.267	0.964	1.364	0.733	0.92
11	0.673	0.96	1.104	0.906	0.913		11	0.441	0.766	1.238	0.808	0.784
12	0.29	0.954	1.063	0.941	0.833		12	0.475	0.866	1.157	0.865	0.863
13	0.441	0.861	1.383	0.723	0.905		13	0.313	0.91	1.094	0.914	0.857
14	0.22	0.725	1.23	0.813	0.76		14	0.557	0.924	1.13	0.885	0.881
15	0.986	0.597	1.857	0.539	0.7		15	0.533	0.781	1.144	0.874	0.844
16	0.267	0.938	1.472	0.68	0.836		16	0.823	0.869	1.037	0.964	0.882
17	0.974	0.678	1.259	0.794	0.8		17	0.881	0.853	1.18	0.848	0.869
18	2.087	0.787	1.198	0.835	0.885		18	0.742	0.885	1.576	0.635	0.948
19	0.301	0.805	1.479	0.676	0.788		19	0.8	0.904	1.013	0.987	0.896
20	0.499	0.974	1.259	0.794	0.896		20	0.394	0.994	1.104	0.906	0.907
21	0.22	0.879	1.215	0.823	0.864		21	0.29	1	1.147	0.872	0.909
22	0.742	0.729	1.375	0.727	0.853		22	0.359	0.907	1.339	0.747	0.861
23	0.754	0.973	1.122	0.892	0.922		23	0.696	0.898	1.085	0.922	0.882
24	0.754	0.92	1.13	0.885	0.884		24	0.719	0.787	1.184	0.844	0.849
25	0.336	0.727	1.225	0.816	0.763		25	0.278	0.916	1.199	0.834	0.814
26	0.765	0.791	1.373	0.728	0.886		26	1.02	0.922	1.064	0.94	0.889
27	0.51	0.715	1.467	0.682	0.8		27	0.348	0.811	1.408	0.71	0.833
28	0.765	0.61	1.323	0.756	0.754		28	0.846	0.849	1.074	0.931	0.869
29	2.562	0.552	1.257	0.796	0.837		29	0.615	0.639	1.157	0.864	0.791
30	0.87	0.842	1.287	0.777	0.882		30	0.765	1	1.031	0.969	0.923
31	0.846	0.6	1.256	0.796	0.811		31	0.638	0.933	1.074	0.931	0.887
32	0.383	0.711	1.431	0.699	0.815		32	0.475	0.826	1.307	0.765	0.854
33	0.487	0.629	1.286	0.778	0.8		33	0.464	0.953	1.216	0.823	0.86
34	1.368	0.575	1.328	0.753	0.834		34	0.603	0.846	1.017	0.983	0.825
35	0.557	0.707	1.249	0.801	0.85		35	0.568	0.682	1.257	0.796	0.824
36	0.348	0.811	1.511	0.662	0.833		36	0.591	0.865	1.102	0.908	0.864
37	0.765	0.768	1.415	0.707	0.825		37	0.638	0.829	1.179	0.848	0.853
38	0.51	0.648	1.124	0.889	0.815		38	0.278	0.941	1.411	0.709	0.889
39	0.591	0.683	1.603	0.624	0.785		39	0.73	0.813	1.083	0.923	0.881
40	0.73	0.983	1.067	0.937	0.906		40	0.603	1	1.094	0.914	0.92
41	0.441	0.717	1.122	0.892	0.826		41	0.359	1	1.238	0.808	0.873
42	0.499	0.827	1.274	0.785	0.851		42	0.475	0.774	1.363	0.733	0.828
43	0.499	0.974	1.065	0.939	0.887		43	0.394	0.81	1.178	0.849	0.829
44	0.267	0.878	1.383	0.723	0.821		44	0.22	1	1.009	0.991	0.864
45	2.887	0.818	1.076	0.93	0.912		45	0.452	0.736	1.288	0.777	0.83
46	0.58	0.736	1.179	0.848	0.826		46	0.232	1	1.083	0.923	0.889
47	0.429	0.602	1.091	0.917	0.779		47	0.313	0.967	1.077	0.929	0.871
48	0.313	0.79	1.837	0.544	0.857		48	0.812	0.775	1.13	0.885	0.833
49	0.348	0.857	1.334	0.749	0.811		49	0.475	0.91	1.032	0.969	0.837
50	1.878	0.96	1.117	0.895	0.945		50	0.394	0.754	1.314	0.761	0.8
51	1.612	0.868	1.194	0.837	0.888		51	0.209	0.965	1.088	0.919	0.837
52	2.4	0.791	1.094	0.914	0.904		52	0.557	1	1.196	0.836	0.897
53	0.696	0.993	1.16	0.862	0.93		53	1.148	0.86	1.192	0.839	0.876
54	0.232	0.717	2.137	0.468	0.755		54	0.58	0.886	1.046	0.956	0.87
55	0.568	0.943	1.056	0.947	0.891		55	0.255	1	1.101	0.908	0.936
56	0.499	0.954	1.104	0.906	0.851		56	0.591	0.921	1.003	0.997	0.879
57	0.823	0.966	1.105	0.905	0.916		57	0.464	0.845	1.111	0.9	0.833
58	0.232	0.764	1.826	0.548	0.769		58	0.499	0.812	1.116	0.896	0.835
59	0.429	0.948	1.125	0.889	0.881		59	0.591	0.865	1.165	0.859	0.829
60	0.707	0.951	1.103	0.907	0.897		60	0.475	0.928	1.138	0.879	0.872
61	0.406	0.917	1.318	0.759	0.921		61	0.29	1	1.079	0.926	0.847
62	2.899	0.884	1.021	0.98	0.929		62	0.232	0.965	1.132	0.883	0.833
63	1.519	0.862	1.082	0.924	0.888		63	0.232	0.994	1.165	0.858	0.889
64	1.612	0.749	1.127	0.888	0.9		64	0.417	0.974	1.157	0.864	0.878
65	0.452	0.704	1.226	0.815	0.812		65	0.568	0.751	1.364	0.733	0.817
66	1.391	0.722	1.187	0.842	0.863		66	0.301	1	1.184	0.845	0.929
67	0.371	0.885	1.338	0.747	0.877		67	0.383	0.892	1.172	0.853	0.892
68	3.131	0.877	1.07	0.934	0.925		68	0.348	0.986	1.054	0.949	0.87
69	0.336	0.784	1.293	0.773	0.829		69	0.487	0.951	1.139	0.878	0.884
70	0.336	0.784	1.52	0.658	0.841		70	1.067	0.964	1.041	0.961	0.911
71	0.696	0.936	1.015	0.985	0.889		71	0.209	1	1.248	0.801	0.947
72	0.661	0.719	1.34	0.747	0.82		72	0.464	0.953	1.181	0.847	0.87
73	2.841	0.936	1.037	0.965	0.933		73	0.359	0.96	1.036	0.965	0.873
74	0.615	1	1.041	0.961	0.93		74	0.29	1	1.181	0.846	0.862
75	0.858	0.802	1.196	0.836	0.881		75	0.325	0.943	1.321	0.757	0.903
76	0.371	0.803	1.307	0.765	0.81		76	0.371	0.846	1.044	0.957	0.821
77	3.583	0.858	1.038	0.963	0.921		77	0.255	0.768	1.128	0.887	0.759
78	0.301	0.743	1.32	0.757	0.825		78	0.336	0.898	1.194	0.837	0.841
79	0.359	0.688	1.262	0.793	0.785		79	0.359	0.886	1.031	0.97	0.816
80	0.29	0.842	1.774	0.564	0.926		80	0.429	1	1.065	0.939	0.892
81	0.615	0.957	1.186	0.844	0.898		81	0.487	0.846	1.196	0.836	0.857
82	0.232	0.784	1.625	0.615	0.851		82	0.232	0.605	1.013	0.987	0.755
83	1.287	0.896	1.044	0.958	0.884		83	0.73	0.813	1.089	0.918	0.887
84	1.299	0.853	1.129	0.886	0.892		84	0.649	0.825	1.059	0.944	0.855
85	0.452	1	1.097	0.912	0.918		85	0.29	0.774	1.126	0.888	0.82
86	0.452	0.75	1.456	0.687	0.867		86	0.209	0.965	1.013	0.987	0.857
87	0.429	0.928	1.215	0.823	0.841		87	0.545	0.947	1.074	0.931	0.887
88	1.206	0.752	1.081	0.925	0.87		88	0.267	0.964	1.063	0.941	0.868
89	1.102	0.919	1.122	0.892	0.892		89	0.255	0.988	1.113	0.898	0.88
90	1.774	0.866	1.107	0.904	0.892		90	0.232	0.764	1.177	0.85	0.8
91	1.449	0.864	1.092	0.916	0.926		91	0.394	1	1.158	0.864	0.907
92	0.881	0.681	1.409	0.71	0.768		92	0.417	0.611	1.167	0.857	0.766
93	0.232	0.898	1.429	0.7	0.816		93	0.742	0.998	1.049	0.953	0.921
94	0.568	1	1.17	0.855	0.942		94	0.22	0.944	1.195	0.837	0.864
95	0.255	0.681	1.539	0.65	0.759		95	0.348	1	1.043	0.959	0.923
96	0.301	0.932	1.149	0.87	0.867		96	0.267	0.824	1.147	0.872	0.852
97	1.217	0.873	1.012	0.988	0.89		97	0.835	0.881	1.053	0.95	0.873
98	0.742	0.958	1.126	0.888	0.914		98	0.359	1	1.058	0.945	0.925
99	2.122	0.86	1.026	0.975	0.917		99	0.383	1	1.113	0.899	0.904
100	0.58	0.903	1.422	0.703	0.877		100	0.417	0.974	1.06	0.944	0.878
101	0.383	0.865	1.171	0.854	0.943		101	0.336	1	1.161	0.861	0.906
102	2.922	0.858	1.03	0.971	0.933		102	0.475	0.976	1.083	0.923	0.882
103	0.974	0.813	1.255	0.797	0.875		103	0.383	0.892	1.125	0.889	0.88
104	0.487	0.888	1.093	0.915	0.824		104	0.232	1	1.038	0.963	0.909
105	0.707	0.863	1.17	0.854	0.878		105	0.522	0.812	1.391	0.719	0.849
106	3.363	0.95	1.007	0.993	0.952		106	0.325	1	1.102	0.908	0.889
107	0.22	0.944	1.656	0.604	0.884		107	0.243	0.88	1.14	0.877	0.857
108	0.893	0.993	1.072	0.933	0.922		108	0.429	0.838	1.138	0.879	0.871
109	0.812	0.991	1.167	0.857	0.915		109	0.29	0.954	1.227	0.815	0.893
110	1.287	0.935	1.171	0.854	0.914		110	0.209	1	1.362	0.734	0.947
111	1.751	0.768	1.289	0.776	0.901		111	0.719	0.984	1.115	0.897	0.939
112	0.383	0.786	1.281	0.781	0.805		112	0.51	0.949	1.149	0.87	0.898
113	0.846	0.875	1.096	0.912	0.88		113	1.299	0.787	1.065	0.939	0.868
114	0.58	0.799	1.374	0.728	0.813		114	0.371	0.446	1.102	0.907	0.688
115	0.464	0.906	1.391	0.719	0.86		115	0.673	0.984	1.108	0.903	0.899
116	0.359	0.96	1.257	0.795	0.873		116	3.003	0.793	1.041	0.961	0.91
117	0.673	0.96	1.176	0.85	0.906		117	0.777	0.987	1.111	0.9	0.899
118	0.742	0.958	1.089	0.918	0.914		118	0.788	0.737	1.13	0.885	0.834
119	1.113	0.929	1.147	0.871	0.893		119	0.742	0.942	1.062	0.942	0.883
120	0.545	0.966	1.157	0.864	0.922		120	0.765	0.972	1.069	0.935	0.904
121	2.377	0.913	1.057	0.946	0.926		121	4.545	0.859	1.028	0.972	0.931
122	0.452	0.771	1.527	0.655	0.796		122	0.754	0.957	1.007	0.993	0.884
123	0.707	0.758	1.264	0.791	0.841		123	4.812	0.868	1.052	0.951	0.937
124	0.383	0.998	1.152	0.868	0.868		124	0.615	0.939	1.09	0.918	0.855
125	1.67	0.702	1.074	0.931	0.857		125	0.719	0.967	1.041	0.961	0.899
126	0.916	0.933	1.203	0.831	0.893		126	0.22	0.624	2.026	0.493	0.691
127	1.519	0.78	1.23	0.813	0.876		127	0.301	0.416	2.812	0.356	0.619
128	0.267	0.803	1.589	0.629	0.754		128	1.09	1	1.113	0.898	0.949
129	0.371	0.991	1.067	0.937	0.889		129	1.09	0.806	1.07	0.934	0.866
130	1.09	0.971	1.1	0.909	0.891		130	0.267	0.803	1.113	0.898	0.78
131	0.359	0.96	1.284	0.779	0.886		131	0.661	0.874	1.135	0.881	0.864
132	0.487	0.824	1.495	0.669	0.866		132	0.313	0.836	1.074	0.931	0.871
133	1.183	0.943	1.067	0.937	0.899		133	0.603	1	1	1	0.929
134	0.8	0.924	1.068	0.936	0.873		134	0.58	0.903	1.157	0.865	0.885
135	0.441	0.766	1.516	0.66	0.817		135	0.765	0.972	1.087	0.92	0.892
136	0.707	0.747	1.174	0.852	0.813		136	0.835	0.837	1.134	0.882	0.852
137	0.742	0.958	1.111	0.9	0.908		137	2.041	0.939	1.019	0.982	0.919
138	1.206	0.915	1.041	0.961	0.92		138	0.417	0.521	1.114	0.898	0.713
139	1.229	0.932	1.16	0.862	0.922		139	0.557	0.906	1.169	0.855	0.857
140	0.928	0.749	1.351	0.74	0.842		140	0.8	0.939	1.073	0.932	0.896
141	0.499	1	1.153	0.867	0.905		141	0.788	0.962	1.18	0.847	0.901
142	0.638	0.95	1.076	0.929	0.902		142	0.58	0.903	1.134	0.882	0.893
143	0.429	0.838	1.415	0.707	0.881		143	0.394	1	1.127	0.887	0.919
144	1.194	0.965	1.034	0.967	0.924		144	0.765	0.833	1.236	0.809	0.852
145	0.441	0.843	1.248	0.801	0.844		145	0.638	0.95	1.082	0.924	0.894
146	0.406	0.834	1.326	0.754	0.795		146	0.452	1	1.111	0.9	0.907
147	2.435	0.819	1.085	0.922	0.903		147	0.568	0.988	1.037	0.964	0.899
148	2.771	0.968	1.009	0.991	0.95		148	0.939	0.909	1.074	0.931	0.89
149	0.487	0.863	1.677	0.596	0.913		149	1.044	0.718	1.012	0.989	0.837
150	0.881	0.848	1.248	0.801	0.916		150	1.183	0.943	1.073	0.932	0.899
151	0.719	1	1.134	0.882	0.947		151	2.447	0.707	1.073	0.932	0.874
152	0.441	0.924	1.232	0.812	0.884		152	0.812	0.608	1.19	0.841	0.814
153	0.591	0.963	1.144	0.874	0.872		153	0.904	1	1.026	0.975	0.918
154	0.487	1	1.16	0.862	0.884		154	0.429	0.798	1.567	0.638	0.851
155	3.931	0.956	1.051	0.952	0.952		155	0.522	0.637	1.238	0.808	0.841
156	0.417	0.876	1.422	0.703	0.878		156	0.336	1	1.057	0.946	0.892
157	0.209	0.868	1.638	0.611	0.857		157	0.475	0.708	1.678	0.596	0.863
158	0.939	0.956	1.08	0.926	0.895		158	0.383	0.623	1.432	0.698	0.742
159	0.835	0.943	1.059	0.944	0.917		159	0.73	0.983	1.126	0.888	0.913
160	1.275	0.955	1.141	0.876	0.928		160	0.939	0.942	1.016	0.984	0.88
161	0.87	0.885	1.179	0.848	0.888		161	0.754	1	1.056	0.947	0.929
162	0.846	0.862	1.17	0.855	0.88		162	1.055	1	1.099	0.91	0.943
163	0.278	0.916	1.353	0.739	0.857		163	0.417	0.996	1.099	0.91	0.923
164	1.194	0.883	1.117	0.895	0.892		164	1.171	0.964	1.08	0.926	0.902
165	1.055	0.967	1.165	0.859	0.929		165	0.278	0.686	1.047	0.955	0.762
166	0.417	0.952	1.417	0.705	0.847		166	0.87	0.967	1.031	0.97	0.898
167	0.533	0.972	1.166	0.858	0.876		167	0.962	0.959	1.032	0.969	0.933
168	0.209	0.808	1.605	0.623	0.837		168	0.742	0.998	1.03	0.971	0.908
169	0.429	0.928	1.248	0.801	0.871		169	0.464	1	1.045	0.957	0.92
170	0.8	0.857	1.353	0.739	0.89		170	0.858	0.887	1.126	0.888	0.908
171	0.487	0.951	1.151	0.869	0.875		171	0.522	1	1.166	0.858	0.918
172	0.243	0.802	1.472	0.679	0.778		172	0.974	0.957	1.045	0.957	0.908
173	0.359	0.907	1.267	0.789	0.873		173	0.452	0.949	1.128	0.887	0.897
174	0.87	0.932	1.073	0.932	0.898		174	0.545	0.833	1.269	0.788	0.81
175	1.032	0.773	1.236	0.809	0.873		175	0.336	0.784	1.396	0.716	0.817
176	0.348	0.929	1.084	0.922	0.896		176	2.11	0.948	1.062	0.942	0.924
177	0.904	0.969	1.165	0.859	0.912		177	0.545	0.993	1.117	0.895	0.895
178	2.215	0.972	1.054	0.949	0.941		178	0.22	1	1.009	0.991	0.864
179	0.812	0.87	1.278	0.783	0.897		179	0.649	0.75	1.188	0.842	0.818
180	0.533	0.992	1.2	0.833	0.911		180	0.928	0.838	1.08	0.926	0.904
181	0.464	0.845	1.33	0.752	0.842		181	0.533	0.972	1.065	0.939	0.876
182	0.22	0.725	1.291	0.775	0.776		182	0.464	0.791	1.213	0.824	0.833
183	0.487	0.808	1.207	0.828	0.857		183	0.499	0.73	1.599	0.625	0.843
184	0.522	0.951	1.36	0.735	0.891		184	0.417	0.799	1.185	0.844	0.828
185	1.357	0.917	1.11	0.901	0.9		185	0.916	0.982	1.063	0.941	0.913
186	1.229	0.788	1.05	0.953	0.872		186	0.719	0.759	1.154	0.866	0.827
187	1.159	0.924	1.075	0.931	0.905		187	0.754	1	1.099	0.91	0.915
188	0.638	0.873	1.3	0.769	0.924		188	0.823	0.916	1.035	0.966	0.887
189	1.484	0.79	1.159	0.863	0.862		189	0.649	0.967	1.062	0.942	0.911
190	0.87	0.899	1.175	0.851	0.904		190	0.997	0.821	1.196	0.836	0.86
191	0.359	0.96	1.132	0.883	0.873		191	0.336	0.657	1.894	0.528	0.866
192	1.067	0.932	1.119	0.894	0.934		192	0.209	0.706	2.288	0.437	0.9
193	0.359	0.886	1.274	0.785	0.849		193	6.018	0.785	1.082	0.924	0.933
194	1.009	0.943	1.135	0.881	0.902		194	4.499	0.736	1.023	0.977	0.902
195	0.336	0.829	1.399	0.715	0.853		195	2.018	0.792	1.029	0.972	0.883
196	1.264	0.766	1.102	0.907	0.901		196	0.58	0.962	1.021	0.98	0.901
197	1.09	0.922	1.117	0.895	0.931		197	0.417	0.799	1.426	0.701	0.8
198	0.29	0.821	1.529	0.654	0.833		198	0.533	0.509	1.289	0.776	0.748
199	1.125	0.97	1.088	0.919	0.911		199	0.394	0.573	3.179	0.315	0.872
200	0.383	0.892	1.349	0.741	0.835		200	0.696	0.976	1.054	0.949	0.896
201	0.545	0.798	1.3	0.769	0.81		201	0.754	0.601	1.115	0.897	0.769
202	0.441	0.819	1.163	0.86	0.884		202	4.626	0.817	1.103	0.907	0.921
203	3.826	0.892	1.043	0.958	0.935		203	6.331	0.875	1.033	0.968	0.936
204	1.82	0.78	1.08	0.926	0.915		204	0.487	0.846	1.078	0.928	0.866
205	0.812	0.953	1.161	0.861	0.903		205	2.377	0.913	1.005	0.995	0.926
206	1.264	0.902	1.247	0.802	0.928		206	1.229	0.882	1.024	0.977	0.883
207	1.345	0.784	1.193	0.838	0.875		207	6.169	0.826	1.043	0.959	0.929
208	0.835	0.943	1.177	0.85	0.917		208	0.522	0.907	1.21	0.826	0.865
209	1.171	0.946	1.1	0.909	0.918		209	0.568	0.988	1.078	0.927	0.899
210	0.997	0.77	1.045	0.957	0.887		210	3.745	0.802	1.035	0.966	0.915
211	0.684	0.976	1.056	0.947	0.915		211	0.997	0.933	1.048	0.954	0.887
212	0.974	0.893	1.157	0.864	0.933		212	6.169	0.868	1.039	0.962	0.933
213	0.974	0.797	1.465	0.683	0.894		213	3.873	0.835	1.019	0.981	0.93
214	1.171	0.84	1.177	0.85	0.894		214	0.684	0.976	1.053	0.95	0.915
215	0.974	0.716	2.025	0.494	0.933		215	6.053	0.88	1.031	0.97	0.944
216	0.452	0.865	1.13	0.885	0.857		216	3.861	0.824	1.041	0.961	0.919
217	0.823	0.916	1.083	0.923	0.899		217	6.795	0.815	1.028	0.972	0.935
218	0.278	1	1.091	0.916	0.98		218	7.583	0.908	1.024	0.977	0.944
219	0.29	1	1.177	0.849	0.926		219	0.997	0.901	1.143	0.875	0.887
220	0.765	0.972	1.076	0.929	0.892		220	6.076	0.872	1.046	0.956	0.937
221	1.368	0.953	1.141	0.876	0.925		221	0.522	0.97	1.133	0.882	0.909
222	0.417	0.761	1.146	0.873	0.828		222	0.51	0.949	1.227	0.815	0.898
223	0.615	0.899	1.076	0.929	0.883		223	1.067	0.964	1.075	0.93	0.906
224	2.748	0.96	1	1	0.948		224	0.603	0.915	1.581	0.632	0.945
225	0.406	1	1.14	0.877	0.921		225	5.38	0.827	1.045	0.957	0.927
226	0.464	0.791	1.202	0.832	0.825		226	0.846	0.994	1.114	0.898	0.918
227	0.522	0.907	1.237	0.808	0.891		227	0.638	0.737	1.025	0.976	0.84
228	0.348	0.986	1.181	0.847	0.87		228	1.217	0.953	1.044	0.958	0.921
229	0.893	0.909	1.074	0.931	0.901		229	4.638	0.819	1.051	0.952	0.923
230	0.939	0.971	1.025	0.976	0.915		230	0.487	1	1.324	0.755	0.944
231	0.928	0.959	1.042	0.96	0.909		231	5.415	0.866	1.017	0.984	0.926
232	1.693	0.972	1.082	0.924	0.936		232	0.383	1	1.051	0.951	0.892
233	0.974	0.868	1.064	0.94	0.88		233	0.765	0.898	1.048	0.954	0.886
234	0.904	0.969	1.129	0.886	0.907		234	0.812	0.991	1.116	0.896	0.909
235	0.615	0.957	1.125	0.889	0.876		235	0.893	0.993	1.037	0.964	0.911
236	2.69	0.924	1.004	0.996	0.932		236	0.707	0.992	1.071	0.934	0.91
237	0.684	0.976	1.063	0.94	0.922		237	1.044	0.93	1.101	0.908	0.887
238	0.522	0.89	1.121	0.892	0.826		238	4.487	0.846	1.021	0.979	0.933
239	0.371	0.762	1.192	0.839	0.865		239	0.858	0.874	1.081	0.925	0.865
240	3.096	0.926	1.014	0.986	0.927		240	0.522	0.719	1.11	0.901	0.769
241	1.391	0.811	1.102	0.908	0.876		241	0.394	0.853	1.169	0.856	0.819
242	1.554	0.942	1.222	0.818	0.918		242	0.916	0.982	1.05	0.953	0.924
243	0.51	0.774	2.172	0.46	0.926		243	0.962	0.98	1.101	0.908	0.907
244	0.962	0.946	1.169	0.855	0.912		244	0.383	0.892	1.087	0.92	0.835
245	0.87	0.932	1.166	0.857	0.904		245	2.423	0.714	1.047	0.955	0.891
246	0.499	0.743	1.113	0.899	0.869		246	3.954	0.747	1.028	0.973	0.909
247	0.22	1	1.161	0.861	0.884		247	4.881	0.832	1.034	0.967	0.928
248	0.788	0.926	1.064	0.94	0.895		248	0.87	0.716	1.06	0.943	0.802
249	0.22	1	1.161	0.861	0.884		249	4.893	0.87	1.02	0.98	0.941
250	0.707	0.951	1.119	0.893	0.897		250	1.762	0.915	1.024	0.976	0.907
251	1.275	0.713	1.067	0.938	0.827		251	0.545	0.887	1.184	0.844	0.855
252	0.336	0.743	1.338	0.747	0.806		252	0.371	1	1.136	0.88	0.889
253	1.426	0.964	1.057	0.946	0.921		253	5.009	0.836	1.021	0.98	0.918
254	0.858	0.954	1.151	0.868	0.897		254	5.044	0.83	1.048	0.954	0.938
255	0.313	0.967	1.321	0.757	0.885		255	0.719	0.967	1.106	0.904	0.905
256	1.078	0.956	1.087	0.92	0.939		256	3.815	0.842	1.049	0.954	0.923
257	2.667	0.916	1.007	0.993	0.927		257	0.893	0.823	1.139	0.878	0.865
258	1.357	0.944	1.072	0.933	0.911		258	0.603	0.831	1.139	0.878	0.852
259	0.499	1	1.088	0.919	0.945		259	1.809	0.892	1.09	0.918	0.926
260	2.354	0.976	1.033	0.968	0.942		260	0.603	0.939	1.082	0.924	0.881
261	2.586	0.888	1.02	0.98	0.929		261	3.536	0.869	1.065	0.939	0.931
262	0.661	1	1.086	0.921	0.912		262	0.661	1	1.089	0.918	0.912
263	0.209	1	1.22	0.819	0.857		263	0.29	1	1.181	0.846	0.862
264	0.267	1	1.202	0.832	0.958		264	1.055	0.805	1.095	0.913	0.875
265	1.171	0.977	1.059	0.944	0.927		265	3.096	0.823	1.012	0.988	0.921
266	1.055	0.954	1.023	0.978	0.901		266	0.568	0.656	1.717	0.582	0.742
267	0.278	1	1.108	0.902	0.906		267	0.696	0.952	1.051	0.952	0.923
268	0.464	0.508	1.343	0.744	0.708		268	0.499	0.974	1.106	0.904	0.896
269	0.858	0.985	1.085	0.921	0.961		269	0.255	0.665	1.22	0.82	0.721
270	0.649	0.95	1.053	0.949	0.882		270	1.055	1	1.067	0.937	0.943
271	1.519	0.969	1.059	0.944	0.946		271	0.359	1	1.196	0.836	0.939
272	0.441	1	1.078	0.927	0.905		272	0.603	0.939	1.114	0.897	0.874
273	1.09	0.953	1.075	0.93	0.917		273	1.229	0.725	1.277	0.783	0.862
274	0.951	0.934	1.109	0.902	0.901		274	0.997	0.98	1.027	0.973	0.915
275	1.241	0.971	1.081	0.925	0.934		275	0.348	0.838	1.08	0.926	0.8
276	1.693	0.972	1.05	0.952	0.936		276	0.719	0.967	1.285	0.778	0.912
277	1.577	0.956	1.08	0.926	0.919		277	0.765	0.779	1.026	0.974	0.868
278	0.893	0.993	1.056	0.947	0.911		278	0.452	1	1.097	0.912	0.918
279	0.325	0.74	1.23	0.813	0.8		279	0.487	0.971	1.328	0.753	0.955
280	1.136	0.935	1.051	0.952	0.887		280	0.638	1	1.035	0.966	0.94
281	1.994	0.95	1.018	0.982	0.925		281	0.499	0.909	1.068	0.936	0.851
282	1.136	0.948	1.1	0.909	0.903		282	1.507	0.94	1.07	0.934	0.922
283	2.191	0.939	1.025	0.975	0.936		283	0.313	0.967	1.086	0.921	0.871
284	1.067	0.964	1.044	0.958	0.911		284	0.893	0.942	1.132	0.883	0.88
285	0.858	0.991	1.047	0.955	0.902		285	0.371	0.968	1.05	0.953	0.831
286	0.464	0.973	1.05	0.953	0.909		286	0.742	0.783	1.061	0.942	0.842
287	1.612	0.95	1.056	0.947	0.93
288	0.684	0.686	1.378	0.726	0.781
289	0.997	0.98	1.101	0.908	0.92
290	0.406	0.947	1.217	0.822	0.886
291	0.696	0.774	1.153	0.867	0.845
292	1.496	0.943	1.034	0.967	0.915
293	0.893	0.957	1.054	0.949	0.911
294	1.531	0.954	1.044	0.958	0.913
295	0.406	0.777	1.323	0.756	0.833
296	0.823	0.951	1.07	0.934	0.893
297	0.893	0.972	1.099	0.91	0.939
298	0.22	1	1.161	0.861	0.884
299	0.499	1	1.088	0.919	0.945
300	0.429	1	1.035	0.967	0.892
