# Supplementary material for: Protein compactness and interaction valency define the architecture of a biomolecular condensate across scales
Source: eLife journal article supplement (doi:10.7554/elife.80038), 2023-07-20
Supplement: fig2-figsupp1-data1 [file summary_table.xlsx]

## Sheet: panels AB
	%24	%1	ENR24	ENR1			%1	%24	ENR1	ENR24
R-Y	10.1301	5.83161	2.10496	1.21176		Y-Y	6.03289	6.77808	1.96992	2.21325
G-Y	7.17636	5.40005	1.17165	0.881641		R-Y	5.83161	10.1301	1.21176	2.10496
Y-Y	6.77808	6.03289	2.21325	1.96992		G-G	5.19117	0.973795	1.69508	0.317974
S-Y	4.30418	4.06798	1.22977	1.16228		S-Y	4.06798	4.30418	1.16228	1.22977
P-Y	4.01216	1.36723	1.83413	0.625019		R-R	3.57557	1.36201	1.89122	0.720404
T-Y	3.76614	1.93325	1.72166	0.883771		N-Y	2.61337	3.13257	1.19468	1.43203
A-Y	3.17824	1.91577	1.45291	0.875781		S-S	2.35246	0.539916	2.35246	0.539916
N-Y	3.13257	2.61337	1.43203	1.19468		A-G	2.28482	0.53881	1.04449	0.246313
Q-Y	2.56269	1.40403	1.46439	0.802303		Q-R	1.90508	1.88965	1.38551	1.37429
P-R	2.34078	1.80351	1.36191	1.04931		P-P	1.85162	0.575851	4.74015	1.47418
	%24	%1	ENR24	ENR1			%1	%24	ENR1	ENR24
A-R	8.13503	6.25722	1.24555	0.958043		A-A	7.68329	4.7594	1.36214	0.843772
A-T	4.08892	2.30151	1.37732	0.775245		G-G	5.29858	1.80845	1.73015	0.590514
A-Q	3.15376	1.38275	1.3279	0.582211		R-R	4.09679	2.25562	2.1669	1.19306
R-T	3.03131	1.95073	1.76367	1.13497		R-S	3.05089	2.80655	1.10941	1.02056
D-R	2.95621	1.26011	2.86663	1.22192		S-S	2.56674	0.48599	2.56674	0.48599
N-R	2.88528	1.71295	1.67871	0.996625		Q-R	2.07917	2.85644	1.51212	2.07741
Q-R	2.85644	2.07917	2.07741	1.51212		P-R	1.99319	2.24346	1.15967	1.30529
R-S	2.80655	3.05089	1.02056	1.10941		P-P	1.97217	0.389118	5.04876	0.996142
G-T	2.78025	1.7539	1.27097	0.801783		R-T	1.95073	3.03131	1.13497	1.76367
R-R	2.25562	4.09679	1.19306	2.1669		P-Q	1.88298	0.604267	3.01277	0.966827
	%24	%1	ENR24	ENR1			%1	%24	ENR1	ENR24
G-Y	10.8924	6.35891	1.77835	1.03819		Y-Y	6.9046	9.56441	2.25456	3.12307
Y-Y	9.56441	6.9046	3.12307	2.25456		G-Y	6.35891	10.8924	1.03819	1.77835
K-Y	6.99046	5.03295	1.45256	1.04581		G-G	5.26883	1.01361	1.72043	0.330975
T-Y	5.1942	2.03595	2.37449	0.93072		K-Y	5.03295	6.99046	1.04581	1.45256
S-Y	5.10429	5.03209	1.45837	1.43774		S-Y	5.03209	5.10429	1.43774	1.45837
A-Y	4.47772	2.6545	2.04696	1.21349		N-Y	3.27988	4.41757	1.49937	2.01946
N-Y	4.41757	3.27988	2.01946	1.49937		K-K	3.09912	0.323284	1.63921	0.170994
P-Y	4.13082	1.62851	1.88837	0.744462		A-Y	2.6545	4.47772	1.21349	2.04696
Q-Y	3.01647	1.64624	1.7237	0.940709		G-N	2.57224	1.1315	1.17588	0.517257
D-Y	1.83024	0.954841	1.39447	0.727498		S-S	2.55557	0.379822	2.55557	0.379822
