# Supplementary material for: Protein compactness and interaction valency define the architecture of a biomolecular condensate across scales
Source: eLife journal article supplement (doi:10.7554/elife.80038), 2023-07-20
Supplement: fig3-data1 [file panel_A_source_data.xlsx]

## Sheet: 24 copies INTER modes
RtoK
0.709565	0.267914	0.174261	0.221739	0.423391	0.0446088	0.0735653	0.119217	0.0143478	0.0203478	0.40513	0.175305	0.16513	0.129391	0.0297391	0.0461738	0.227478	0.027913	0.147653	0.0973042	0.148956	0.220696	0.697044	0.206869	0.217565	0.0986088	0.0641738	0.171653	0.3	0.412956	0.349306	0.290347	0.337044	0.339653	0.372782	0.890347	1.57096	3.32244	1.88974	2.07495	1.99043	2.68332	2.94079	1.8707	4.59103	1.56887	1.41782	0.446609	0.430956	0.16513
M	S	G	Y	T	G	N	N	Y	S	K	Y	S	S	T	P	P	K	Q	K	G	G	Y	H	H	A	K	K	S	K	G	G	A	G	G	S	Y	Y	K	G	G	N	A	S	Y	G	A	K	Y	N
WT
0.459912	0.427826	0.237392	1.60148	0.672	0.0873914	0.653738	0.629479	2.91703	1.26548	0.733306	0.622435	0.184696	0.519391	0.121565	0.327914	0.703826	0.565826	0.436956	1.04478	0.471391	0.595565	1.46348	0.961044	2.0773	0.852782	1.68287	0.534	0.417391	0.819653	0.158869	0.176087	0.274174	0.342	1.06226	1.77965	2.46103	1.62809	2.436	0.374086	0.619044	1.2733	1.71548	2.502	3.67853	0.617218	0.41087	0.921653	0.769565	0.121826
M	S	G	Y	T	G	N	N	Y	S	R	Y	S	S	T	P	P	R	Q	R	G	G	Y	H	H	A	R	R	S	R	G	G	A	G	G	S	Y	Y	R	G	G	N	A	S	Y	G	A	R	Y	N
YtoA
0.769044	0.489912	0.540262	0.614347	0.60887	0.259303	0.298174	0.229044	0.193566	0.151304	0.448174	0.187044	0.152347	0.330262	0.224087	0.44687	0.414782	0.391565	0.189391	0.466697	0.230869	0.235565	0.248347	0.459653	0.69913	0.751303	1.69931	1.32548	0.629479	1.01609	0.632088	0.343565	0.301306	0.196696	0.170087	0.333391	0.211826	0.379565	0.418956	0.348521	0.588521	0.660262	0.485218	0.412435	0.388435	0.284347	0.279653	0.594262	0.268956	1.07426
M	S	G	A	T	G	N	N	A	S	R	A	S	S	T	P	P	R	Q	R	G	G	A	H	H	A	R	R	S	R	G	G	A	G	G	S	A	A	R	G	G	N	A	S	A	G	A	R	A	N
[truncated: 30 more columns]
