# Supplementary material for: Protein compactness and interaction valency define the architecture of a biomolecular condensate across scales
Source: eLife journal article supplement (doi:10.7554/elife.80038), 2023-07-20
Supplement: fig3-figsupp1-data1 [file panel_BC_source_data.xlsx]

## Sheet: panel B
contacts	WT	YtoA	RtoK
pairwise	0.962138	0.979453	0.964731
2D	-0.023739	-0.0321298	-0.0199511

## Sheet: panel C
modes	WT	YtoA	RtoK
INTER repesentative vs average	0.766286	0.609333	0.827757
INTER repesentative vs INTRA	0.0493488	0.199929	0.183404
INTER repesentative vs INTRA24	-0.0456254	0.268917	0.0177479
INTER average vs INTRA24	0.176169	0.163237	0.250251
INTRA24 vs INTRA	0.708581	0.876186	0.750459
