# Supplementary material for: Protein compactness and interaction valency define the architecture of a biomolecular condensate across scales
Source: eLife journal article supplement (doi:10.7554/elife.80038), 2023-07-20
Supplement: fig6-figsupp1-data1 [file panels_AB_source_data.xlsx]

## Sheet: Dextran quantification
Intensity* inside condensates - Experiment 1					Intensity* inside condensates - Experiment 2						Experiment 1
65-85 kDa	150 kDa	2 MDa			65-85 kDa	150 kDa	2 MDa
1007.37	1440.81	1579.37			3078.74	1626.1	1151.72					65-85kDa	150kDa	2MDa
1161.15	1615.73	1523.88			3083.59	1669.27	1177.84
991.665	1535.94	1508.67			3577.02	1748.35	1276.82				Average in	1376.58	1640.77	1446.46
995.637	1592.17	1622.83			3604	1516.5	1130.7				Stdev in	276.208	139.827	70.5217
1140.63	1565.28	1468.39			4831.75	1590.69	1120.04				Average out	336.92	585.913	1189.55
1139.96	1489.62	1456.74			3175.16	1642.4	1124.89				Stdev out	19.2846	76.4304	29.4355
1133.36	1593.4	1488.25			3061.84	1623.38	1209.06
1045.4	1452.52	1373.37			3172.82	1815.56	1193.28
1238.36	1617.8	1408.6			3656.5	1624.69	1134.39				Partition ratio (FIin/FIout)	4.08577	2.80037	1.21597
1055.12	1561.12	1509.23			3242.21	1728.25	1121.26				Error	0.852507	0.436345	0.0664829
748.119	1441.46	1445.98			3691.64	1806.96	1172.76				n	52	55	54
860.795	1560.42	1519.66			3219.32	1806.3	1118.6
990.864	1577.26	1425.95			2977.54	1806.46	1009.54
1088.19	1831.96	1395.87			3059.93	1647.75	1025.27				Experiment 2
958.891	1562.39	1507.82			3117.82	1590.18	1059.86
1139.51	1519.46	1468.36			2898.42	1479.97	1027.93					65-85kDa	150kDa	2MDa
1783.96	1531.59	1558.32			3093.56	1693.65	1050.52
1672.03	1350.9	1467.2			3079.95	1540.61	1074.24				Average in	3158.01	1705.86	1104.09
1579.19	1589.43	1522.37			2920.55	1710.64	975.027				Stdev in	301.496	138.459	64.123
1622.97	1682.98	1402.6			3257.16	1405.49	1069.69				Average out	1243.57	556.603	842.812
1765.71	1670.51	1627.63			2991.24	1639.29	1151.78				Stdev out	31.9087	39.4374	31.9912
1335.32	1499.13	1431.43			3158.77	1413.27	1106.81
1766.43	1461.04	1507.97			3027.31	1604.09	1022.45
1749.41	1586.92	1445.16			3062.6	1947.42	1138.17				Partition ratio (FIin/FIout)	2.53948	3.06476	1.31
1655.16	1479.98	1526.13			3039.44	2087.97	1194.71				Error	0.251048	0.330204	0.0908903
1709.27	1945.23	1420.83			3022.46	1848.53	1091.46				n	56	59	56
1805.61	1759.57	1501.48			3025.11	1875.08	1267.47
1533.44	1860.37	1427.56			3011.78	1865.56	1116.88
1603.52	1677.36	1418.52			3043.63	1839.71	1139.87				Average from the two experiments
1720.38	1736.46	1391.46			2652.58	2121.75	1073.55
1893.98	1711.75	1308.8			3044.27	1754.95	1124.18					65-85kDa	150kDa	2MDa
1366.35	1603.06	1374.94			2951.26	1494.07	1081				Partition ratio (FIin/FIout)	3.31262	2.93257	1.26299
1366.47	1715.53	1498.51			3034.72	1809.26	1028.6				Error	0.551778	0.383274	0.0786866
1385.53	1900.76	1524.86			3031.28	1694.06	1048.45				n	108	114	110
1275.07	1428.22	1496.79			2872.9	1797.8	1075.51
1375.5	2027.92	1470.69			3042.91	1787.09	1047.57
1314.89	1754.99	1439.76			3087.12	1730.37	1067.41				*Intensity is fluorescent intensity (a.u.)
1232.68	1688.08	1441.9			3298.04	1805.28	1112.44
1558.04	1740.89	1326.01			3381.25	1773.71	1040.49
1284.61	1714.99	1429.17			3257.83	1780.36	1066.22
1294.02	1722.33	1417.67			3105.13	1708.06	1180.57
1360.23	1735.51	1420			3002.39	1655.61	1161.88
1513.5	1743.33	1362.46			2989.87	1656.59	1204.07
1393.96	2020.32	1428.8			2970.32	1797.31	1080.29
1527.14	1669.98	1346.83			3152.43	1630.04	1089.37
1377.05	1679.11	1407.37			3096.18	1665.48	1107.21
1274.33	1615.01	1395.46			3097.78	1563.88	1017.54
1476.4	1584.72	1397.55			3007.76	1745.84	1066.98
1475.01	1606.79	1383.15			3032.56	1900.74	1183.43
1692.63	1610.83	1348.12			3281.09	1653.86	1142.31
1602.34	1582.96	1363.52			3095.54	1733.16	1091.52
1533.82	1676.44	1477.9			3108.67	1776.6	1036.26
1387.7	1602.87	1358.84			3068.85	1736.68	1072.06
	1650.37	1366.92			3239.29	1657.36	1055.19
	1619.47	1417.7			3725.15	1598.28	1020.09
	1688.3				3109.37	1611.95	1073.94
					3088.08	1931.5	1131.78
						1649.52
						1655.58
						1646.02
Intensity* outside condensates - Experiment 1					Intensity* outside condensates - Experiment 2
65-85 kDa	150 kDa	2 MDa			65-85 kDa	150 kDa	2 MDa
342.05	653.722	1194.75			1249.2	512.441	889.438
344.891	655.992	1194.94			1263.36	545.196	870.975
342.675	658.725	1168.61			1235.29	544.383	866.941
333.089	654.874	1201.56			1223.76	543.245	901.289
339.807	649.557	1206.93			1243.03	564.227	871.87
349.356	653.485	1192.73			1289.44	530.51	857.467
341.735	634.432	1198.08			1250.21	531.531	831.525
317.761	662.991	1182.61			1286.23	550.015	851.927
318.301	671.116	1218.99			1254.61	547.929	821.752
314.37	654.524	1222.81			1263.15	542.691	824.09
299.766	697.759	1189.98			1216.05	607.698	869.22
314.849	665.098	1144.43			1252.3	573.352	842.052
311.448	505.514	1146.28			1225.97	589.331	804.698
350.828	517.767	1155.27			1213.2	591.968	773.18
345.698	531.429	1172.87			1278.86	605.469	800.883
335.438	523.892	1169.67			1277.74	613.913	864.431
338.493	525.18	1195.35			1298.19	628.585	865.766
373.145	515.878	1181.19			1249.89	628.715	800.34
354.53	510.051	1218			1241.59	617.708	803.223
370.178	498.236	1221.79			1205.17	596.423	779.956
	498.208	1193.39			1189.06	604.797	866.767
	523.644	1264.7			1205.97	508.929	885.119
	520.091	1213.26			1255.06	526.316	846.913
	479.745	1180.67			1281.81	525.042	856.107
		1167.59			1260.25	507.859	881.924
		1175.04			1217.54	524.124	879.184
		1181.1			1167.25	531.522	852.478
		1155.09			1200.95	537.211	825.712
		1244.76			1268.3	545.564	827.335
		1134.14			1243.56	526.493	839.137
						499.328	825.709
						508.786	844.052
							817.176
							816.985
