# Supplementary material for: Protein compactness and interaction valency define the architecture of a biomolecular condensate across scales
Source: eLife. 2023 Jul 20;12:e80038. doi: 10.7554/eLife.80038 (PMC10406433; doi:10.7554/eLife.80038)
Supplement: Figure 1—figure supplement 2—source data 1. [file elife-80038-fig1-figsupp2-data1.xlsx]

## Sheet: FRAP fitting
system	fitting*	χ2**	R	Teil U
center
Laf1	3D	0.756347	0.975287	0.335788
	2D	0.297118	0.980474	0.21046
	1D	0.0721549	0.984616	0.103714
	simple	0.0403149	0.986534	0.0775243
	double	0.00389969	0.998691	0.0241113
Lge1 1-80 WT	simple	0.254213	0.944014	0.141924
	double	0.00196621	0.999455	0.0124816
Lge1 1-80 R>K	simple	0.099345	0.987377	0.0875931
	double	0.00267464	0.999476	0.0143724
periphery
Lge1 1-80 WT	simple	0.0512255	0.986591	0.0725259
	double	0.00389448	0.998973	0.0199974
Lge1 1-80 R>K	simple	0.118511	0.978925	0.0922017
	double	0.0023134	0.999494	0.012882
whole
Lge1 1-80 WT	simple	0.0947535	0.946978	0.118143
	double	0.00726266	0.996035	0.0327083
Lge1 1-80 R>K	simple	0.0194734	0.996517	0.049042
	double	0.000218646	0.999956	0.00519658
*fitting exponential model (1D,2D,3D - is from Taylor et al, Biophys. J. 2019)
** parameters of an exponential fit for different FRAP timeseries:
χ2 - probablity for chi-square test
R - Pearson correlation coefficient
Teil U - Teil's inequality coefficient

## Sheet: FRAP, half time
protein	a*	b	τ(a)	τ(b)	t½, s**
LGE1(1-80)
center
WT	0.616003	0.377663	454.797	13.5585	98.0824
R>K	0.735572	0.244963	319.837	23.4222	126.096
periphery
WT	0.765027	0.225692	512.482	10.5154	221.28
R>K	0.508063	0.472279	415.372	41.2463	75.7136
whole
WT	0.698301	0.292647	1085.76	10.8689	365.342
R>K	0.634312	0.356231	674.089	169.658	265.668
* C(t) =1- a exp(-t/τ(a)) - b exp(-t/τ(b))
** half-times by a numerical solution of C(t½) = a exp(-t½/τ(a)) + b exp(-t½/τ(b)) = 0.5
(using WolframAlpha online)

## Sheet: Calculation R & bleached area
According to Taylor et al., Biophys J. 2019														Bleached area = bleached spot area (um2) / total condensate area
														Radius bleached = SQRT (area / π)
R=radius of bleach spot = defined experimentally as half-width of where the normalized C* = 0.75															wt center	Bleached percentage					wt perifery	Bleached percentage					wt whole	Bleached							R>K center	Bleached percentage	Center Average					R>Kperifery	Bleached percentage						R>K whole
																													Average bleach=average whole condensate area
														Bleached	9.505	34.5599	Average bleach			Bleached	7.641	25.7316	Average bleach				13.16	100	14.1807					Bleached	3.874	26.4545	Average bleach (Area)				Bleached	4.012	25.5541	Average bleach (area)					9.972
wt - center bleach				R>K - center bleach										whole	27.503		8.68445			whole	29.695		4.618				9.647	100	Radius bleach					whole	14.644		7.38058				whole	15.7		6.35325					12.824
		R (um)				R(um)								Bleached	9.934	47.4131	Average area condensate			Bleached	2.296	30.9392	Average area condensate				15.224	100	2.12458					Bleached	7.989	33.1893	Average area condensate				Bleached	4.997	34.1232	Average area condensate					11.465
7.67	5.87	0.9		4.3	6.03	0.865								whole	20.952		29.4046			whole	7.421		15.9397				12.581	100						whole	24.071		25.4975				whole	14.644		27.083					10.876
7.01	5.2	0.905		5.92	7	0.54								Bleached	9.717	36.452	Radius bleach			Bleached	3.826	35.1784	Radius bleach= SQRT(A/pi)				20.187	100						Bleached	8.012	29.1314	Radius bleach				Bleached	4.905	23.8188	Radius bleach					17.277
7.43	5.92	0.755		5.061	6.138	0.5385								whole	26.657		1.66263			whole	10.876		1.21242				14.285	100						whole	27.503		1.53275				whole	20.593		1.42208					18.042
7.65	5.71	0.97		5.92	7.11	0.595								Bleached	8.198	40.6103	Percentage bleached area			Bleached	3.571	33.1877	Percentage bleached area											Bleached	7.908	26.1915	Percentage bleached area				Bleached	3.931	19.4392	Percentage bleached area					13.473
5.92	3.88	1.02		4.092	5.492	0.7								whole	20.187		29.5343			whole	10.76		31.4466											whole	30.193		28.9463				whole	20.222		24.247					12.864
6.25	4.15	1.05		4.85	6.57	0.86								Bleached	8.354	28.1668				Bleached	3.548	39.2304												Bleached	6.053	19.7514					Bleached	2.852	23.3809						11.862
6.03	4.63	0.7		4.846	6.03	0.592								whole	29.659					whole	9.044													whole	30.646						whole	12.198							9.983
5.492	3.446	1.023		5.06	6.25	0.595								Bleached	7.953	27.8028				Bleached	4.499	19.266												Bleached	6.516	34.5621					Bleached	9.67	32.5644						12.523
5.599	3.984	0.8075		5.92	7.32	0.7								whole	28.605					whole	23.352													whole	18.853						whole	29.695							7.711
6.78	5.28	0.75		5.38	6.57	0.595								Bleached	9.96	34.8191				Bleached	3.247	27.3731												Bleached	6.829	31.244					Bleached	6.25	18.2104						8.685
														whole	28.605					whole	11.862													whole	21.857						whole	34.321							16.882
	Average	0.88805			Average	0.65805								Bleached	8.401	18.6784				Bleached	6.47	48.022												Bleached	7.792	25.827					Bleached	5.299	31.3662
	Stdev	0.128066			Stdev	0.120945								whole	44.977					whole	13.473													whole	30.17						whole	16.894
														Bleached	9.27	26.0415				Bleached	5.229	49.503												Bleached	6.911	25.0753					Bleached	7.027	22.5629
														whole	35.597					whole	10.563													whole	27.561						whole	31.144
														Bleached	9.044	21.7875				Bleached	3.896	34.1485												Bleached	7.861	33.0239					Bleached	7.134	21.3484
														whole	41.51					whole	11.409													whole	23.804						whole	33.417
														Bleached	9.427	23.3648				Bleached	5.958	26.0698												Bleached	8.105	24.2374					Bleached	8.024	24.893
														whole	40.347					whole	22.854													whole	33.44						whole	32.234
														Bleached	8.986	19.2783				Bleached	5.461	21.7241												Bleached	6.111	49.7476					Bleached	4.58	18.6058
														whole	46.612					whole	25.138													whole	12.284						whole	24.616
														Bleached	8.966	31.953				Bleached	5.45	23.455												Bleached	6.574	27.7384					Bleached	8.36	18.7175
														whole	28.06					whole	23.236													whole	23.7						whole	44.664
														Bleached	4.893	28.3603				Bleached	3.56	26.4232												Bleached	10.03	28.6817					Bleached	7.537	24.1826
														whole	17.253					whole	13.473													whole	34.97						whole	31.167
														Bleached	9.334	43.6087																		Bleached	9.902	26.9736					Bleached	7.293	23.469
														whole	21.404																			whole	36.71						whole	31.075
														Bleached	8.661	34.4538																		Bleached	5.971	23.482					Bleached	6.47	17.8562
														whole	25.138																			whole	25.428						whole	36.234
														Bleached	7.502	31.1661																		Bleached	8.279	35.4531					Bleached	7.134	22.1319
														whole	24.071																			whole	23.352						whole	32.234
														Bleached	9.114	34.8728																		Bleached	7.838	31.7662					Bleached	8.035	24.0281
														whole	26.135																			whole	24.674						whole	33.44
														Bleached	8.296	24.8086																		Bleached	7.676	37.2748					Bleached	6.528	24.5635
														whole	33.44																			whole	20.593						whole	26.576
														Bleached	8.174	38.2302																									Bleached	7.027	34.1232
														whole	21.381																											20.593
[truncated: 2 more columns]

## Sheet: Source data for fitting
Calculation of <C*> as described in Taylor et al, Bioph J. 2019
n = number of condensates analyzed
Lge1 1-80 WT									Lge1 1-80 R>K									LAF1
	n=13		n=20		n=13					n=20		n=18		n=22
	Periphery		Center		Whole					Periphery		Center		Whole
t(s)	Average	St dev	Average	St dev	Average	St dev			t(s)	Average	St dev	Average	St dev	Average	St dev			t (s)	Average	St dev
-1	1	0	1	0	1	0			-1	1	0	1	0	1	0			-1	1	0
0	0	0	0	0	0	0			0	0	0	0	0	0	0			0	0	0
6.667	0.147674	0.078895	0.174095	0.0729375	0.165476	0.0384908			6.667	0.102713	0.0445912	0.11542	0.0520537	0.0292269	0.0115702			6.667	0.0971292	0.0557464
13.334	0.193699	0.104651	0.263205	0.0683903	0.232459	0.0502446			13.334	0.175994	0.0573174	0.169605	0.0501854	0.0508537	0.0171491			13.334	0.130462	0.0557809
20.001	0.219662	0.10062	0.32104	0.0665483	0.265754	0.049019			20.001	0.238484	0.0665781	0.210358	0.0522996	0.0704484	0.0220146			20.001	0.154359	0.0567306
26.668	0.246298	0.0873357	0.362715	0.0647794	0.279634	0.0543722			26.668	0.286107	0.0676529	0.242168	0.0630169	0.088641	0.0264595			26.668	0.170197	0.0632556
33.335	0.255424	0.128749	0.392657	0.0575731	0.291013	0.0476681			33.335	0.326647	0.0718382	0.273364	0.0616542	0.105858	0.0305844			33.335	0.186861	0.0565433
40.002	0.277931	0.118628	0.405637	0.0604617	0.299288	0.0475054			40.002	0.359646	0.0702124	0.296962	0.0581734	0.122665	0.0341163			46.669	0.203602	0.0555093
53.336	0.304714	0.111868	0.442013	0.0521352	0.320788	0.0460089			53.336	0.415121	0.0679115	0.338341	0.0654484	0.155726	0.0419429			60.003	0.230323	0.0570195
66.67	0.315986	0.115237	0.459627	0.0545998	0.323396	0.0454756			66.67	0.460477	0.063014	0.380661	0.0651706	0.186006	0.0473206			73.337	0.250315	0.0571912
80.004	0.342072	0.118405	0.483957	0.0617443	0.342471	0.0580782			80.004	0.504611	0.0667422	0.413537	0.0661644	0.214925	0.0519819			86.671	0.266044	0.0570036
93.338	0.385385	0.0986813	0.489274	0.0534331	0.347822	0.0569966			93.338	0.534758	0.0693717	0.442983	0.0649735	0.242467	0.0559352			100.005	0.287998	0.0609241
106.672	0.397856	0.100528	0.507462	0.0568701	0.366991	0.0555855			106.672	0.568061	0.0600265	0.469049	0.0630153	0.267655	0.0584723			113.339	0.303607	0.063816
120.006	0.404467	0.108858	0.532333	0.0509573	0.368221	0.0629512			120.006	0.590725	0.0609323	0.497652	0.0642436	0.292453	0.0605703			146.673	0.317715	0.0650107
153.34	0.428291	0.117897	0.570431	0.0539759	0.400389	0.0723624			153.34	0.636559	0.0639999	0.555621	0.0622135	0.349212	0.0645395			180.007	0.355634	0.06771
186.674	0.480694	0.111366	0.589733	0.0521775	0.425744	0.0739569			186.674	0.674183	0.0741701	0.603591	0.0646829	0.398895	0.0676057			213.341	0.386706	0.0677083
220.008	0.511113	0.0982962	0.624362	0.0514087	0.449854	0.078608			220.008	0.706018	0.0611949	0.638166	0.0607416	0.442106	0.0671538			246.675	0.418549	0.073124
253.342	0.547805	0.0942742	0.65183	0.0508306	0.473032	0.0824042			253.342	0.731019	0.0579815	0.672036	0.0568998	0.482137	0.0675941			280.009	0.445023	0.0790248
286.676	0.554845	0.103473	0.681891	0.0441071	0.48593	0.0848561			286.676	0.757482	0.0590251	0.704788	0.062302	0.518767	0.0678768			313.343	0.473488	0.084579
320.01	0.599314	0.10599	0.709071	0.0531956	0.503403	0.0855141			320.01	0.772511	0.0593158	0.739359	0.066872	0.550974	0.0689267			380.01	0.491004	0.0905854
386.677	0.636033	0.088087	0.752532	0.0639371	0.530183	0.0920532			386.677	0.806204	0.0604502	0.778788	0.0622664	0.607935	0.0661014			446.677	0.538708	0.0954846
453.344	0.677453	0.0857308	0.779216	0.0520185	0.553868	0.0921509			453.344	0.829108	0.0602818	0.817964	0.0681831	0.653989	0.063843			513.344	0.567835	0.101982
520.011	0.702611	0.0852269	0.804239	0.0483275	0.575937	0.0880403			520.011	0.855889	0.0610003	0.847655	0.0688298	0.694825	0.0610743			580.011	0.593254	0.0984803
586.678	0.746034	0.0786737	0.825652	0.0544781	0.601149	0.110634			586.678	0.868753	0.0602189	0.872224	0.0671575	0.725087	0.0572453			646.678	0.621977	0.102958
653.345	0.784048	0.0853559	0.855262	0.0478038	0.621889	0.109607			653.345	0.884721	0.0587977	0.891668	0.071923	0.751105	0.0557422			713.345	0.6483	0.101264
720.012	0.805809	0.0693938	0.86412	0.0375718	0.645049	0.115799			720.012	0.900442	0.0619014	0.914044	0.068399	0.775733	0.0554097			780.012	0.677908	0.10328
786.679	0.830677	0.076606	0.882223	0.0316474	0.658676	0.11831			786.679	0.912178	0.0640781	0.928917	0.0684375	0.796765	0.054809			846.679	0.695821	0.105812
853.346	0.853292	0.0753783	0.88713	0.0425215	0.668852	0.126823			853.346	0.926815	0.0646403	0.945982	0.0627459	0.817379	0.0562172			913.346	0.722222	0.108929
920.013	0.875763	0.0653243	0.908603	0.0348147	0.682782	0.120406			920.013	0.942752	0.0658477	0.954596	0.0549479	0.833227	0.0579086			980.013	0.746057	0.107567
986.68	0.899771	0.0764685	0.924513	0.0426588	0.695072	0.127072			986.68	0.959686	0.072628	0.97408	0.0636694	0.851052	0.0582924			1040	0.761335	0.115038
1053.35	0.912432	0.0666993	0.930259	0.0439104	0.704643	0.123543			1053.35	0.97238	0.07146	0.983544	0.0552056	0.870768	0.0588438			1106.67	0.775863	0.114053

## Sheet: FI whole bleach
Fluorescent intensity measured as line profile over the condensates in ImageJ
WT									R>K
	prebleach	bleach								prebleach	bleach
time (sec)	-1	0	120	720	1030				time (sec)	-1	0	120	720	1030
um									um
0	683.136	567.057	622.159	655.107	674.583				0	668	565	614	646	680
0.107	678.718	575.525	627.074	659.292	676.158				0.107	669	569	626	655	682
0.215	677.74	575.004	628.295	662.405	686.401				0.215	666	582	631	666	681
0.323	678.636	570.179	626.364	670.271	693.224				0.323	660	581	620	681	680
0.4307	674.707	576.719	619.192	679.915	700.671				0.4307	649	577	619	674	694
0.5384	691.045	586.161	620.997	683.914	709.929				0.5384	653	572	631	666	706
0.6461	714.933	587.099	626.134	689.227	716.148				0.6461	654	571	644	677	728
0.7538	724.417	583.775	633.626	691.394	720.551				0.7538	659	571	649	703	742
0.8614	707.783	582.566	631.018	679.626	717.643				0.8614	665	587	653	716	748
0.9691	692.868	582.414	625.971	672.186	718.784				0.9691	678	607	656	705	743
1.0768	700.642	578.592	634.926	675.335	728.857				1.0768	692	606	662	713	740
1.1845	710.07	574.274	646.658	690.178	744.067				1.1845	696	601	660	730	757
1.2922	722.129	583.172	648.453	706.718	758.157				1.2922	697	613	658	751	767
1.3998	728.332	600.295	639.264	722.755	758.96				1.3998	706	630	669	752	788
1.5075	735.573	609.533	628.811	730.959	765.57				1.5075	721	630	684	746	805
1.6152	742.567	605.76	641.052	731.237	768.615				1.6152	733	625	690	755	823
1.7229	747.357	596.8	657.222	728.836	770.601				1.7229	742	623	689	767	866
1.8306	754.943	597.151	664.626	733.168	778.514				1.8306	764	634	692	794	898
1.9382	763.226	601.812	662.811	752.867	798.176				1.9382	792	634	706	819	909
2.0459	777.205	607.028	663.367	776.281	830.496				2.0459	794	618	708	820	939
2.1536	791.227	621.245	672.256	783.104	848.431				2.1536	801	604	716	840	978
2.2613	800.352	630.511	675.775	801.217	861.811				2.2613	804	603	718	910	942
2.369	802.547	629.001	681.519	820.406	879.775				2.369	827	620	729	954	920
2.4766	815.807	629.637	690.312	840.049	890.841				2.4766	831	630	761	908	1079
2.5843	842.993	635.867	694.947	852.583	921.997				2.5843	859	636	780	934	1407
2.692	879.351	638.244	695.322	855.691	954.844				2.692	918	658	765	1163	1671
2.7997	899.224	640.886	702.028	879.804	912.425				2.7997	918	683	767	1471	1734
2.9074	916.518	627.254	710.289	883.786	943.413				2.9074	962	691	888	1637	1697
3.015	927.857	619.96	718.43	852.589	1188.09				3.015	1067	687	1094	1624	1727
3.1227	941.364	629.402	730.441	884.71	1369.35				3.1227	1117	749	1225	1596	1748
3.2304	949.227	647.459	735.131	1147.94	1429.15				3.2304	1052	863	1213	1596	1798
3.3381	975.449	654.475	732.65	1266.2	1586.47				3.3381	1158	933	1151	1613	1833
3.4458	1016.49	649.412	783.086	1324.44	1624.9				3.4458	1633	943	1150	1673	1871
3.5534	975.8	672.791	958.029	1471.85	1658.66				3.5534	2197	929	1177	1718	1901
3.6611	1008.95	769.26	1113.21	1518.51	1709.24				3.6611	2450	945	1219	1738	1923
3.7688	1318.08	876.683	1155.12	1531.5	1758.95				3.7688	2330	936	1244	1742	1936
3.8765	1647.45	913.384	1101.02	1562.64	1780.81				3.8765	2226	926	1250	1765	1983
3.9842	1868.44	888.486	1098.38	1599.08	1813.7				3.9842	2167	926	1259	1829	2043
4.0918	1913.73	884.234	1124.86	1644.68	1844.66				4.0918	2145	938	1264	1847	2067
4.1995	2028.16	909.091	1144.43	1695.42	1871.27				4.1995	2167	957	1259	1871	2082
4.3072	2010.88	918.954	1150.9	1725.86	1896.15				4.3072	2206	957	1266	1871	2067
4.4149	2055.57	920.254	1153.11	1741.52	1913.04				4.4149	2278	967	1291	1918	2094
4.5226	2090.69	923.813	1155.63	1740.74	1918.29				4.5226	2318	966	1318	1955	2137
4.6302	2151.73	938.5	1173.28	1734.29	1955.98				4.6302	2347	960	1319	1960	2168
4.7379	2216.68	942.406	1194.06	1752.8	1990.98				4.7379	2371	955	1319	1940	2171
4.8456	2262	937.995	1213.54	1769.49	2010.26				4.8456	2405	968	1326	1938	2166
4.9533	2279.08	928.392	1224.35	1805.37	2009.71				4.9533	2425	984	1331	1956	2197
5.061	2269.43	928.543	1225.33	1828.27	2038.7				5.061	2465	989	1315	1985	2198
5.1686	2291.92	933.574	1236.72	1840.79	2065.17				5.1686	2479	977	1308	1985	2213
5.2763	2321.71	943.092	1255.32	1867.78	2077.27				5.2763	2524	970	1338	1977	2205
5.384	2335.74	953.691	1258.28	1900.34	2111.98				5.384	2547	966	1360	2016	2231
5.4917	2367.83	947.282	1261.61	1913.12	2120.33				5.4917	2562	970	1360	2037	2249
5.5994	2404.83	935.547	1253.18	1910.02	2125.47				5.5994	2567	973	1322	2050	2227
5.707	2446.17	932.118	1239.39	1910.62	2145.69				5.707	2562	969	1318	2035	2260
5.8147	2453.38	929.807	1237.56	1912.11	2161.39				5.8147	2585	977	1330	2025	2271
5.9224	2458.48	927.968	1244.78	1934.05	2170.16				5.9224	2596	962	1348	2041	2299
6.0301	2465.1	931.321	1263.17	1955.98	2153.12				6.0301	2610	956	1348	2029	2297
6.1378	2491.73	942.103	1267.49	1955.51	2149.67				6.1378	2615	958	1358	2027	2271
6.2454	2512.15	943.79	1258.79	1944.52	2146.06				6.2454	2620	968	1372	2053	2271
6.3531	2516.92	933.717	1249.23	1932.36	2148.25				6.3531	2631	978	1388	2063	2277
6.4608	2522.44	920.877	1250.27	1937.65	2136.89				6.4608	2629	975	1364	2087	2267
6.5685	2532.76	909.572	1265.87	1932.27	2154.66				6.5685	2665	974	1347	2064	2283
6.6762	2540.01	903.25	1265.18	1924.82	2165.86				6.6762	2683	968	1333	2063	2291
6.7838	2550.24	909.888	1266.7	1934.26	2165.58				6.7838	2678	959	1320	2061	2297
6.8915	2556.99	912.748	1259.85	1945.62	2173.69				6.8915	2657	948	1316	2028	2268
6.9992	2559.56	917.096	1246.62	1948.54	2165.5				6.9992	2627	943	1301	2017	2244
7.1069	2549.18	916.907	1237.61	1950.51	2155.97				7.1069	2640	935	1303	1982	2223
7.2146	2540.23	913.823	1236.8	1958.94	2176.93				7.2146	2620	949	1302	1986	2194
7.3222	2549.25	914.165	1256.13	1953.74	2173.65				7.3222	2607	946	1299	1991	2174
7.4299	2554.48	916.981	1270.58	1948.35	2171.93				7.4299	2608	936	1303	1991	2169
7.5376	2558.73	920.49	1257.71	1944.76	2161.17				7.5376	2627	926	1304	1997	2169
7.6453	2556.8	910.864	1247.08	1941.62	2147.63				7.6453	2613	939	1299	1983	2145
7.753	2526.22	897.784	1237.2	1918.09	2139.11				7.753	2584	948	1285	1977	2128
7.8606	2502.94	893.791	1238.57	1894.7	2127.47				7.8606	2567	935	1270	1962	2131
7.9683	2503.54	902.675	1227.08	1881.84	2118.77				7.9683	2546	929	1263	1945	2145
8.076	2513.29	900.795	1219.67	1890.16	2101.69				8.076	2545	926	1251	1900	2114
8.1837	2526.12	894.182	1214.6	1895.37	2094.28				8.1837	2515	925	1247	1863	2087
8.2914	2501.41	881.793	1204.47	1871.89	2063.64				8.2914	2502	921	1233	1825	2034
8.399	2468.57	878.114	1201.7	1851.48	2029.43				8.399	2491	920	1226	1827	2000
8.5067	2429.94	877.584	1210.48	1834.92	2010.06				8.5067	2456	914	1201	1815	1987
8.6144	2388.93	873.093	1207.97	1803.29	1998.14				8.6144	2411	913	1180	1794	1963
8.7221	2368.03	868.064	1186.78	1779.27	1977.34				8.7221	2364	908	1174	1749	1934
8.8298	2350.83	863.393	1165.67	1750.06	1955.29				8.8298	2342	900	1148	1710	1888
8.9374	2321.54	856.71	1141.4	1710.94	1909.29				8.9374	2335	888	1138	1674	1871
9.0451	2279.95	849.847	1127.17	1687.72	1875.09				9.0451	2289	871	1127	1655	1855
9.1528	2227.04	829.502	1117.2	1653.88	1848.5				9.1528	2249	864	1153	1630	1804
9.2605	2181.82	814.593	1099.85	1624.11	1807.58				9.2605	2198	851	1221	1610	1748
9.3682	2148.49	814.247	1073.04	1595.7	1759.43				9.3682	2140	863	1230	1613	1710
9.4758	2133.66	816.929	1059.47	1581.69	1731.4				9.4758	2102	905	1096	1666	1731
9.5835	2095.47	819.655	1083.13	1564.26	1721.95				9.5835	2114	899	874	1607	1711
9.6912	2063.74	812.628	1082.22	1565.91	1716.72				9.6912	2307	803	730	1357	1480
9.7989	2069.98	784.355	992.497	1482.75	1698.55				9.7989	2364	688	733	1045	1153
9.9066	1974.54	725.098	827.16	1441.16	1645.78				9.9066	1980	661	758	894	957
10.0142	1936.13	661.333	737.486	1217.47	1567.8				10.0142	1384	672	747	900	954
10.1219	1879.79	636.896	732.787	933.937	1251.68				10.1219	1030	658	718	918	987
10.2296	1458.97	641.353	749.395	853.976	973.33				10.2296	1016	642	728	883	953
10.3373	1093.54	632.087	732.98	858.063	919.8				10.3373	1070	650	744	842	927
10.445	1040.51	620.289	714.02	890.198	939.981				10.445	1038	662	742	836	912
10.5526	1079.94	611.571	696.806	890.842	930.41				10.5526	982	652	724	825	881
10.6603	1045.96	607.898	683.967	876.077	899.511				10.6603	982	641	710	818	838
10.768	1004.68	605.722	681.204	854.69	890.826				10.768	971	642	711	806	823
10.8757	975.688	603.753	678.073	823.618	872.879				10.8757	935	634	700	792	813
10.9834	937.534	598.667	673.549	792.121	843.936				10.9834	917	631	691	768	781
11.091	911.095	596.043	671.473	780.585	826.449				11.091	885	632	687	746	771
11.1987	884.495	588.836	664.527	767.943	805.958				11.1987	857	638	682	730	758
11.3064	860.664	584.15	655.758	753.332	792.434				11.3064	841	634	673	736	756
11.4141	837.012	586.061	651.299	740.214	780.683				11.4141	809	614	655	731	744
11.5218	814.862	584.452	647.597	716.67	769.982				11.5218	790	617	648	715	726
11.6294	798.974	582.613	639.979	698.007	755.936				11.6294	768	628	644	710	713
11.7371	788.951	572.395	633.309	700.952	736.281				11.7371	741	624	652	704	707
11.8448	774.505	571.53	634.877	700.452	715.999				11.8448	719	605	657	687	707
11.9525	758.503	573.307	635.631	694.451	715.96				11.9525	711	593	653	675	706
12.0602	732.34	575.973	630.649	684.662	731.134				12.0602	723	604	646	686	700
12.1678	704.095	569.169	620.951	679.601	719.631				12.1678	723	606	639	699	701
12.2755	683.526	559.403	615.571	675.083	704.457				12.2755	716	603	642	696	699
12.3832	675.157	557.427	612.707	669.346	690.449				12.3832	689	601	647	678	696
12.4909	681.051	573.381	605.579	664.836	680.321				12.4909	677	608	651	675	689
12.5986	682.812	577.722	614.077	659.195	676.836				12.5986	673	612	664	679	689
12.7062	682.102	576.128	623.241	663.162	672.066				12.7062	680	610	672	684	688
12.8139	685.637	572.681	622.177	669.369	670.439				12.8139	680	616	672	675	695
12.9216	691.85	566.675	609.796	663.374	666.281				12.9216	687	634	664	674	697
13.0293	682.567	568.307	601.196	657.819	661.661				13.0293	679	636	667	690	703
13.137	671.341	574.678	596.999	659.776	660.859				13.137	673	630	682	709	702
13.2446	661.671	576.372	603.383	653.585	663.104				13.2446	680	623	691	712	714
13.3523	660.016	565.009	613.606	644.032	658.239				13.3523	697	626	689	716	731
13.46	650.714	553.352	619.137	632.764	648.902
13.5677	646.557	551.861	613.584	626.564	649.407
13.6754	651.895	561.91	604.357	629.852	658.326
13.783	650.699	574.985	605.068	633.58	656.531
13.8907	638.326	580.109	611.518	635.778	651.643
