# Supplementary material for: Protein compactness and interaction valency define the architecture of a biomolecular condensate across scales
Source: eLife. 2023 Jul 20;12:e80038. doi: 10.7554/eLife.80038 (PMC10406433; doi:10.7554/eLife.80038)
Supplement: Figure 2—source data 1. [file elife-80038-fig2-data1.xlsx]

## Sheet: WT24_1us_last300ns
	frac	enr
R-Y	0.101301	2.10496
G-Y	0.0717636	1.17165
Y-Y	0.0677808	2.21325
S-Y	0.0430418	1.22977
P-Y	0.0401216	1.83413
T-Y	0.0376614	1.72166
A-Y	0.0317824	1.45291
N-Y	0.0313257	1.43203
G-R	0.0281833	0.585627
Q-Y	0.0256269	1.46439
rest	0.521411
				WT multicopy last 0.3 µs
