# Supplementary material for: Protein compactness and interaction valency define the architecture of a biomolecular condensate across scales
Source: eLife. 2023 Jul 20;12:e80038. doi: 10.7554/eLife.80038 (PMC10406433; doi:10.7554/eLife.80038)
Supplement: Figure 5—figure supplement 2—source data 1. [file elife-80038-fig5-figsupp2-data1.xlsx]

## Sheet: Sheet1
name	Mw, kDa	Rg, nm	j	n	A	B
WT	9.067	1.60113	0.686	3.81	2.4195	1.1923
Y>A	7.778	1.97358	0.368	2.31	1.6347	1.2488
R>K	8.759	1.68212	0.612	2.08	2.0884	1.2927
