# Supplementary material for: Protein compactness and interaction valency define the architecture of a biomolecular condensate across scales
Source: eLife. 2023 Jul 20;12:e80038. doi: 10.7554/eLife.80038 (PMC10406433; doi:10.7554/eLife.80038)
Supplement: Supplementary file 1. [file elife-80038-supp1.xlsx]

## Sheet: MD derived parameters
system	Rg, nm		j		n
	average	st.dev.	average	st.dev.	average	st.dev.
last 0.3 µs
WT24	1.60113	0.221826	0.686141	0.194153	3.81157	1.56069
Y>A24	1.97358	0.42728	0.368747	0.201926	2.31313	1.28266
R>K24	1.68212	0.270656	0.611882	0.269111	2.08544	1.3395
WT	1.58478	0.124614	0.681154	0.14594
Y>A	1.70664	0.287491	0.521767	0.216084
R>K	1.8114	0.353874	0.511777	0.233091
1 µs
WT24	1.59182	0.257985	0.721748	0.242575	2.79211	1.66835
Y>A24	1.88138	0.384464	0.409935	0.198149	1.94639	1.22204
R>K24	1.69702	0.294097	0.595146	0.243272	1.74683	1.2348
WT	1.53035	0.180245	0.782571	0.227957
Y>A	1.82991	0.342375	0.433182	0.194786
R>K	1.80886	0.386501	0.526833	0.254042
* all mutual comparisons of WT and mutants datasets revelead p-value < 2.2E-16 according to Wilcoxon rank sum test with continuity correction

## Sheet: Block convergence metric
system	St. Dev* (j ), %	St. Dev ( n ), %
last 0.3 µs
WT24	2.02101	4.1172
Y>A24	2.49647	6.8568
R>K24	3.80422	7.65804
* Standard deviations for block averaged values (5 blocks @ last 0.3 µs) in % of the reported average value

## Sheet: MD derived parameters (replica)
system	Rg, nm		j
	average	st.dev.	average	st.dev.
last 0.3 µs
WT(run1)	1.60069	0.121628	0.660239	0.141938
WT(run2)	1.56887	0.12553	0.702068	0.146888
Y>A(run1)	1.82029	0.303946	0.435315	0.199579
Y>A(run2)	1.59299	0.216996	0.608219	0.196483
R>K(run1)	1.90403	0.434371	0.484875	0.280001
R>K(run2)	1.71878	0.211228	0.53868	0.16975
1 µs
WT(run1)	1.61052	0.178505	0.663732	0.167628
WT(run2)	1.45017	0.142326	0.901411	0.218137
Y>A(run1)	1.80886	0.263604	0.426059	0.167583
Y>A(run2)	1.85095	0.405054	0.440305	0.218398
R>K(run1)	1.97094	0.434096	0.420296	0.225371
R>K(run2)	1.64678	0.24039	0.633371	0.235759

## Sheet: box dimensions
system	Average*	RMSD	Tot-Drift
WT 24
Box-X	17.9393	0.00328562	0.000350775
Box-Y	17.9393	0.00328562	0.000350775
Box-Z	17.9393	0.00328562	0.000350775
Y>A 24
Box-X	17.9439	0.00327813	0.000139448
Box-Y	17.9439	0.00327813	0.000139448
Box-Z	17.9439	0.00327813	0.000139448
R>K 24
Box-X	18.9926	0.00320161	0.000281464
Box-Y	18.9926	0.00320161	0.000281464
Box-Z	18.9926	0.00320161	0.000281464
WT(run1)
Box-X	8.99723	0.00469567	1.61288e-05
Box-Y	8.99723	0.00469567	1.61288e-05
Box-Z	8.99723	0.00469567	1.61288e-05
WT(run2)
Box-X	8.99715	0.00471788	0.000162457
Box-Y	8.99715	0.00471788	0.000162457
Box-Z	8.99715	0.00471788	0.000162457
Y>A(run1)
Box-X	8.99945	0.00469983	-0.000105323
Box-Y	8.99945	0.00469983	-0.000105323
Box-Z	8.99945	0.00469983	-0.000105323
Y>A(run2)
Box-X	8.99951	0.00470488	0.000202076
Box-Y	8.99951	0.00470488	0.000202076
Box-Z	8.99951	0.00470488	0.000202076
R>K(run1)
Box-X	8.99579	0.00470678	2.51652e-06
Box-Y	8.99579	0.00470678	2.51652e-06
Box-Z	8.99579	0.00470678	2.51652e-06
R>K(run2)
Box-X	8.99584	0.00469355	-0.000242542
Box-Y	8.99584	0.00469355	-0.000242542
Box-Z	8.99584	0.00469355	-0.000242542
* values in nm

## Sheet: distance to pereodic image
protein	<distance>*	st.dev.	contact frequency**
WT 24	13.1228		0
1	13.4798	0.320269	0
2	13.1726	0.68035	0
3	13.0362	0.523132	0
4	13.2772	0.384631	0
5	12.5782	0.723466	0
6	12.9506	0.643401	0
7	13.4175	0.370323	0
8	13.6682	0.363122	0
9	13.0206	0.815831	0
10	13.1554	0.580506	0
11	13.8222	0.32247	0
12	12.6536	0.677545	0
13	13.3804	0.459488	0
14	13.5427	0.401146	0
15	12.5421	1.19387	0
16	13.352	0.567273	0
17	13.6371	0.340736	0
18	12.5972	0.84114	0
19	13.551	0.435488	0
20	12.5977	0.600579	0
21	13.0343	0.611554	0
22	13.1364	0.467582	0
23	13.3596	0.614322	0
24	11.9849	1.31628	0
Y>A 24	12.4351		0
1	12.3915	0.879169	0
2	12.1803	1.42527	0
3	11.8695	1.11958	0
4	12.3798	0.820669	0
5	12.6881	0.915729	0
6	12.6333	1.06482	0
7	12.5563	1.06854	0
8	12.3653	0.870558	0
9	12.6119	0.762026	0
10	13.0293	0.708663	0
11	11.6156	1.29874	0
12	12.8706	1.2012	0
13	11.9704	1.34978	0
14	12.9311	0.83008	0
15	12.6829	0.824353	0
16	12.2409	0.97086	0
17	12.6459	0.978264	0
18	12.2402	1.00448	0
19	12.9009	0.718285	0
20	12.0976	1.04266	0
21	12.7404	0.814026	0
22	12.2267	1.06999	0
23	12.6002	0.884008	0
24	11.9728	1.11573	0
R>K 24	13.9034		0
1	14.7039	0.566442	0
2	13.8545	0.696963	0
3	14.5179	0.574136	0
4	14.5609	0.433076	0
5	13.6743	0.959223	0
6	13.9439	0.693551	0
7	13.5044	0.690117	0
8	14.1051	0.604195	0
9	14.1055	0.955141	0
10	14.4378	0.472139	0
11	14.2066	0.719188	0
12	13.2988	1.13314	0
13	14.1285	0.599367	0
14	13.8407	0.71487	0
15	14.3557	0.589491	0
16	13.1165	0.857609	0
17	13.3848	0.924672	0
18	13.6476	0.860911	0
19	13.9216	0.711072	0
20	13.8479	0.905905	0
21	13.5077	0.846299	0
22	13.4386	0.8598	0
23	14.1407	0.642047	0
24	13.4373	0.626938	0
WT(run1)	4.29688	0.6382	0
WT(run2)	4.74996	0.507415	0
Y>A(run1)	3.87392	0.801334	5.0251e-06
Y>A(run2)	3.84478	0.974514	0.00176884
R>K(run1)	3.62925	0.98983	0.00154499
R>K(run2)	4.21295	0.748191	0
* values in nm
** in 200001 analyzed MD frames
