# Supplementary material for: Protein compactness and interaction valency define the architecture of a biomolecular condensate across scales
Source: eLife. 2023 Jul 20;12:e80038. doi: 10.7554/eLife.80038 (PMC10406433; doi:10.7554/eLife.80038)
Supplement: Supplementary file 2. [file elife-80038-supp2.xlsx]

## Sheet: Sheet1
MD data*	MSD**	s.d.	viscosity	s.d.	finite size correction	s.d.	rescaled	s.d.	final correction %	s.d.	finite size correction %	s.d.
1 µs
WT24	62.4686	15.2938	1.01623	0.0461167	95.1894	19.4999	117.509	18.3968	92.2521	18.5304	59.824	15.4048
RtoK24	94.5698	19.497	1.08217	0.164178	122.12	26.8707	151.448	23.453	61.8348	8.69453	34.5374	7.22794
YtoA24	92.8699	15.7603	1.00633	0.114592	124.721	24.146	154.495	18.9581	67.6271	7.91998	39.3526	6.58417
last 0.3 µs
WT24	43.9936	16.8069	1.01623	0.0461167	79.2133	16.8069	95.2855	20.217	134.941	57.6072	95.3129	47.8903
RtoK24	93.33	22.3522	1.08217	0.164178	124.663	22.3523	149.957	26.8875	63.5317	13.2538	35.948	11.0182
YtoA24	71.8879	20.855	1.00633	0.114592	107.454	20.8549	129.256	25.0864	83.8803	15.9735	52.8643	13.2793
1 µs
WT	16.3577	2.59826	0.83681	0.0715259	101.931	0.302642	122.613	0.36416	658.966	118.328	530.948	98.3699
RtoK	18.0943	4.32855	0.87126	0.03215	105.413	2.96773	126.802	3.57018	623.856	192.894	501.76	160.356
YtoA	18.5492	1.40361	0.831148	0.0490755	103.561	6.77755	124.573	8.15294	571.842	6.88439	458.519	5.72403
* averaged values between 24 copies or 2 MD replicas
**diffusion coefficients in µm2/s
viscosity in mPa*s
